# Supplementary material for: PACAP-Deficient Mice Exhibit Light Parameter–Dependent Abnormalities on Nonvisual Photoreception and Early Activity Onset
Source: PubMed Central journal article supplement (PMC2823792; doi:10.1371/journal.pone.0009286), 2010-02-18
Supplement: pone.0009286.s001.pdf [file pone.0009286.s001.pdf]

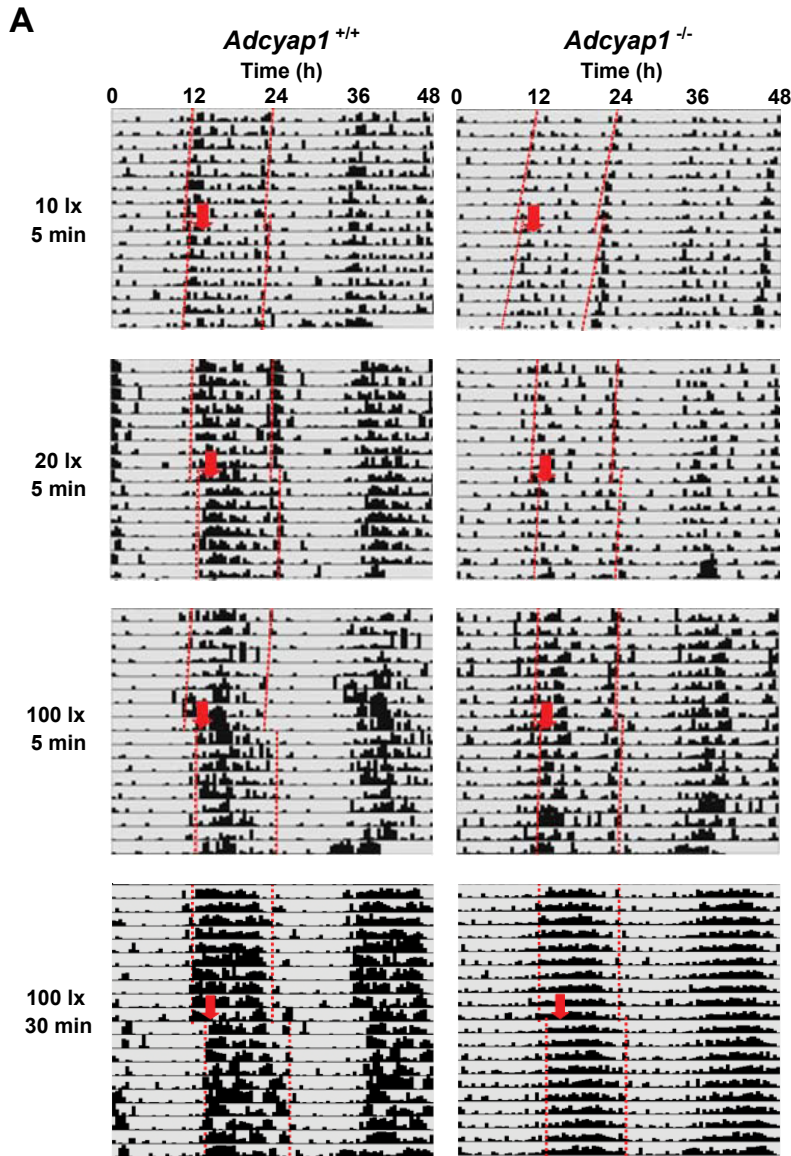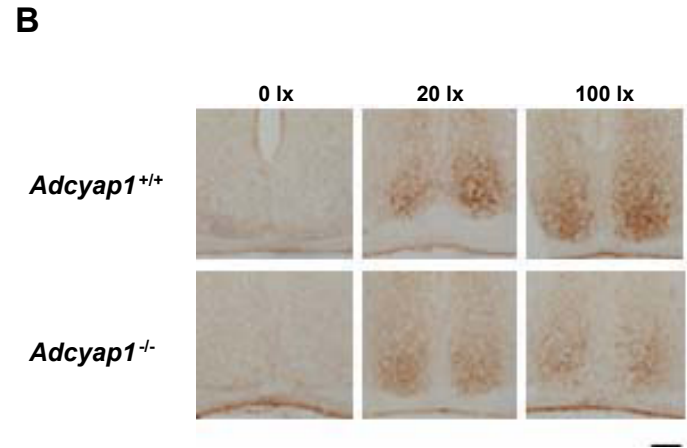

**Figure S1. (A)** Representative double-plotted actogram during DD conditions. Red arrows indicate photic stimulation for 5 or 30 min at CT15. Paired red dashed lines represent onset and ending of activity. **(B)** Photomicrographs showing light-induced ERK phosphorylation, 7.5 min (20 lx) or 15 min (100 lx) after light stimulation at CT15. Scale bar = 100  $\mu$ m.
